# Supplementary material
Source: PubMed Central journal article supplement (PMC2935477)
Supplement: djq301_3.pdf [file djq301_3.pdf]

Figure S3

A

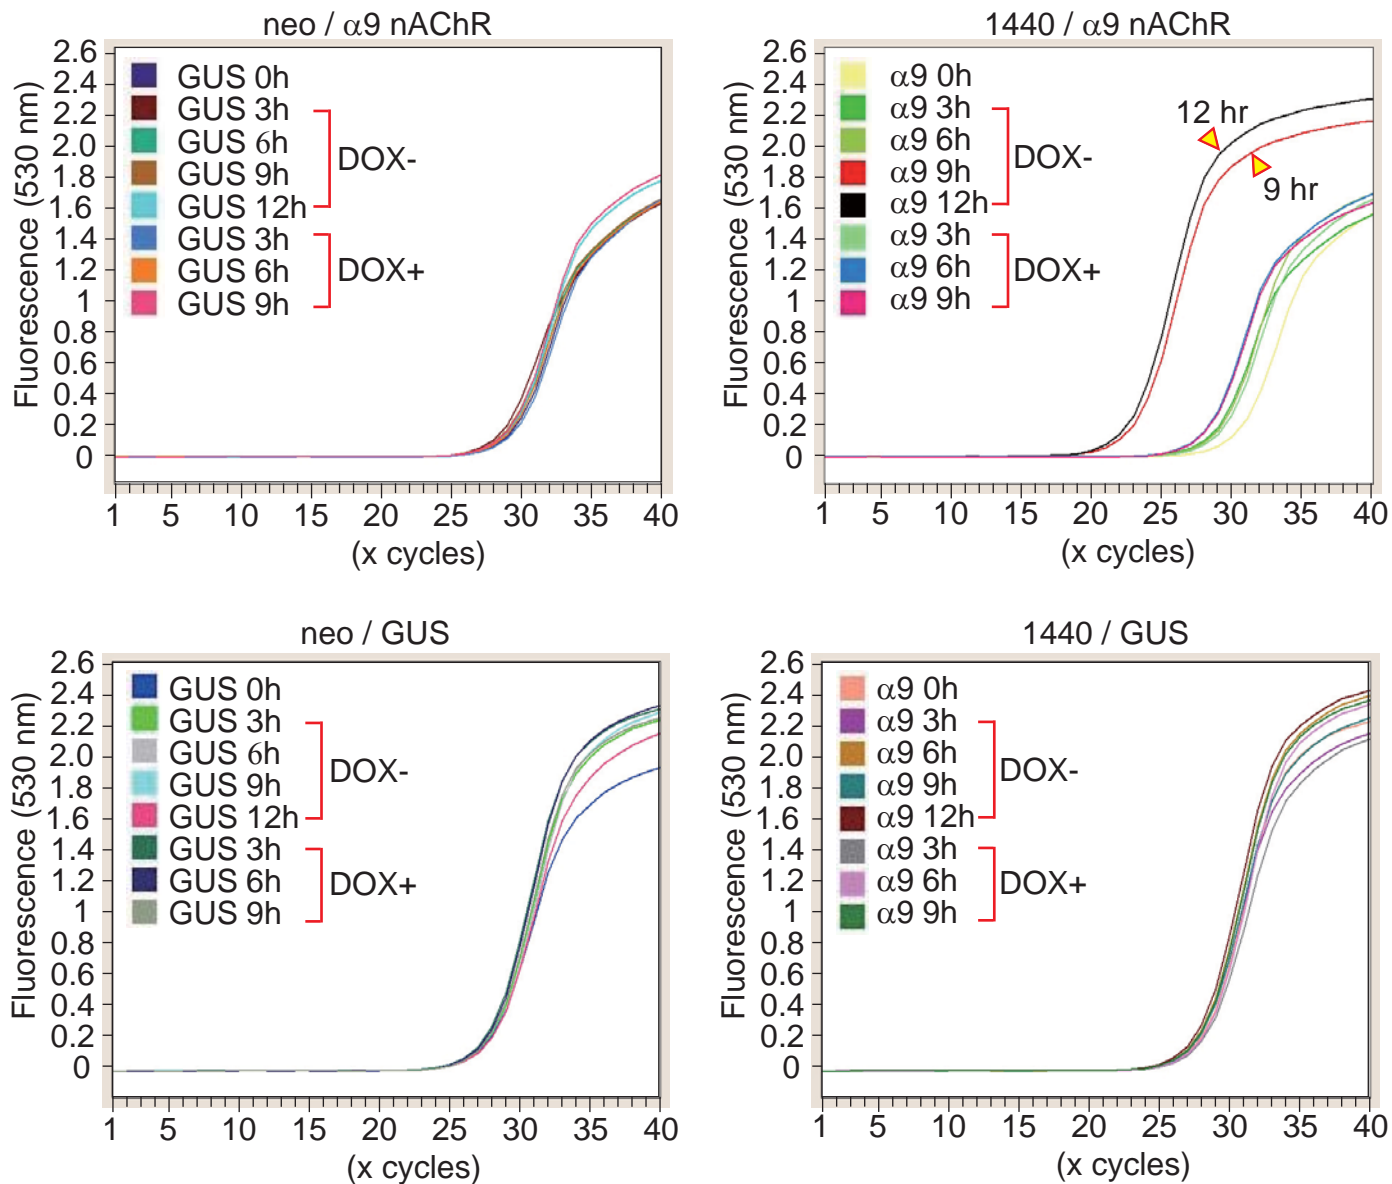

B

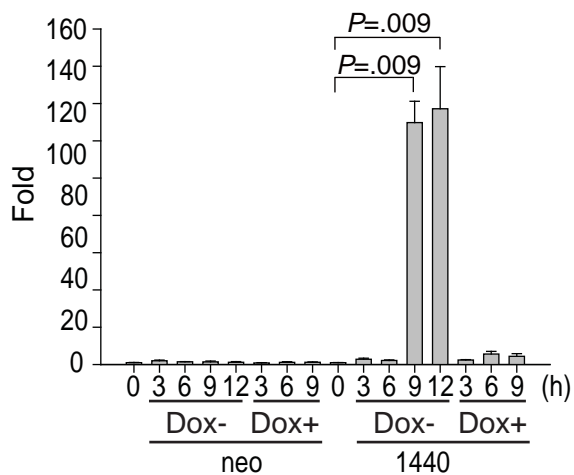

C

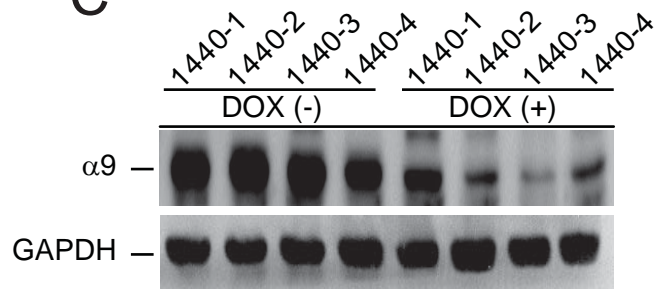

**Figure S3.** Establishment of transformed human breast epithelial MCF-10A (DOX) cells that overexpressed the  $\alpha 9$ -nicotinic acetylcholine receptor ( $\alpha 9$ -nAChR) via a tetracycline-based (Tet-off)-regulatory system. **A, B)** Inducible  $\alpha 9$ -nAChR expression. Human MCF-10A (DOX) cells were cultured in fresh growth medium containing 10% serum and 1  $\mu\text{g}/\text{mL}$  of the tetracycline analog, doxycycline (DOX+).  $\alpha 9$ -nAChR mRNA expression was induced in MCF-10A (DOX) cells (designated as 1440) in a time-dependent manner after removal of DOX. Cells infected with adenovirus vector alone (designated as neo) were used as a control. Data points represent the means; error bars indicate 95% confidence intervals. Inducible  $\alpha 9$ -nAChR expression was compared in MCF-10A (DOX-) cells at 0 vs 9 and 12 hours ( $P = .009$ ).  $\beta$ -glucuronidase (GUS) gene expression from each sample was analyzed for internal control. Data were analyzed using nonparametric tests (Kruskal Wallis and Mann-Whitney test); all  $P$ -values are two-sided.

**C)** The level of  $\alpha 9$ -nAChR protein expression in MCF-10A (DOX-) cells increased substantially 24 hours after removal from DOX (lanes 1–4) in comparison to control MCF-10A (DOX+) cells (lanes 5–8).
