# Supplementary material
Source: PubMed Central journal article supplement (PMC2935477)
Supplement: djq301_4.pdf [file djq301_4.pdf]

Figure S4

A

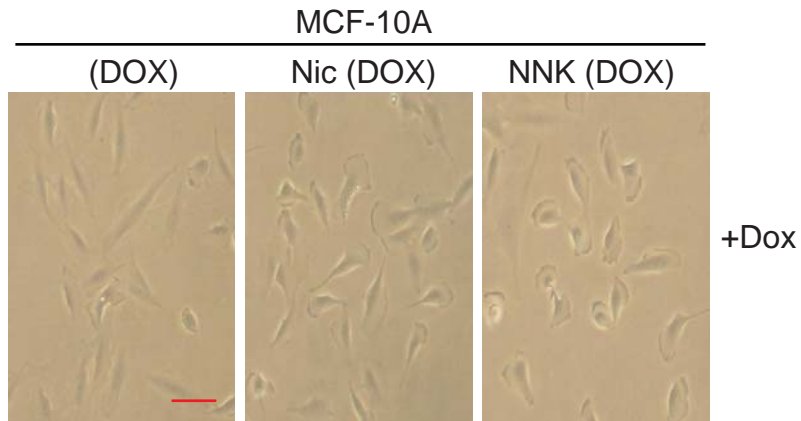

B

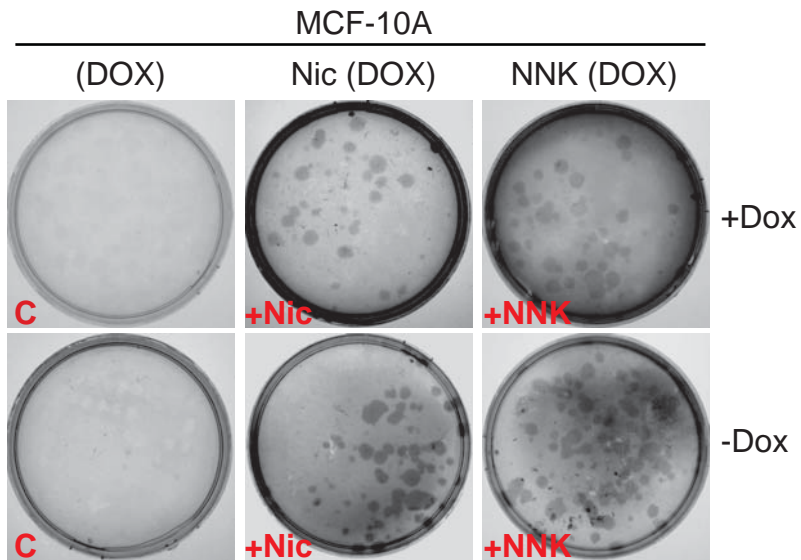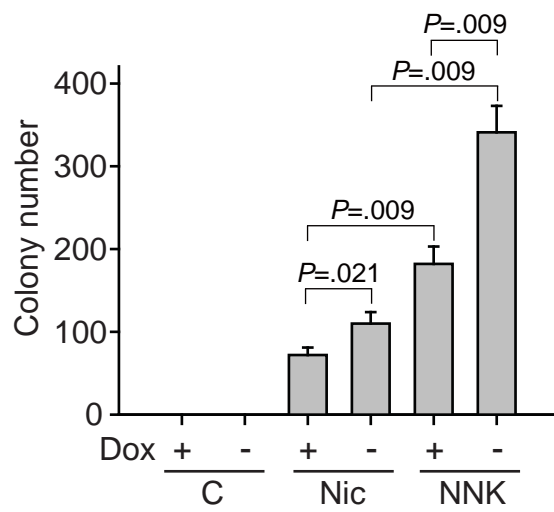

**Figure S4.** Establishment of  $\alpha 9$ -nicotinic acetylcholine receptor ( $\alpha 9$ -nAChR)-overexpressing transformed human breast epithelial cells: MCF-10A-Nic (DOX) and MCF-10A-NNK (DOX). MCF-10A (DOX) cells were treated with the nicotine metabolite, 4-(methylnitrosamino)-1-(3-pyridyl)-1-butanone (NNK; 1  $\mu$ M) or nicotine (Nic; 10  $\mu$ M) and the medium was replaced every 2 days for 60 days according to previously described methods [9]. **A)** Morphologies of MCF-10A-Nic (DOX) and MCF-10A-NNK (DOX) cells. Both cell lines exhibited subtle changes in morphology, including a slight increase in roundedness compared with the parental MCF-10A (DOX) cells. Scale bar = 25  $\mu$ m. **B)** Number of colonies scored for the soft-agar plates. To investigate the role of acquired  $\alpha 9$ -nAChR overexpression in colony formation, MCF-10A-Nic (DOX) and MCF-10A-NNK (DOX) transformed cells were seeded in soft agar with or without DOX. The treatment conditions were the same as those described in Figure 4, B. Parental MCF-10A (DOX) cells that were transiently infected with an  $\alpha 9$ -nAChR adenovirus did not transform into colonies in soft agar (bars 1–2). These results demonstrate that overexpression of  $\alpha 9$ -nAChR in MCF-10A (DOX) cells without long-term exposure to NNK or nicotine could not induce malignant cell transformation. The colonies present in a whole area were counted for each plate. C, vehicle control. Data represent the mean of nine samples in each group; error bars are 95% confidence intervals. Comparisons were performed for DOX+ Nic+ vs DOX- Nic+ ( $P = .021$ ), DOX+ NNK+ vs DOX- NNK+ ( $P = .009$ ), DOX+ Nic+ vs DOX+ NNK+ ( $P = .009$ ), and DOX- Nic+ vs DOX- NNK+ ( $P = .009$ ). Data were analyzed with nonparametric tests (Kruskal Wallis and Mann-Whitney test); all  $P$ -values are two-sided.
