# Supplementary material
Source: PubMed Central journal article supplement (PMC2935477)
Supplement: djq301_5.pdf [file djq301_5.pdf]

Figure S5

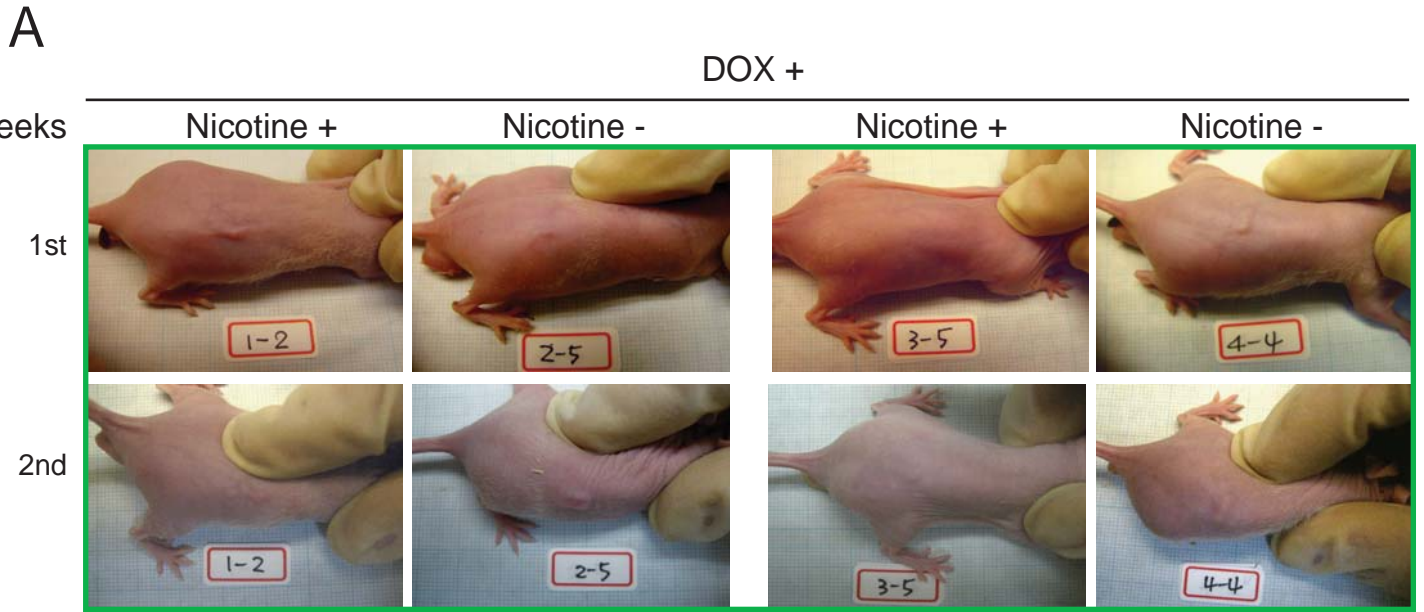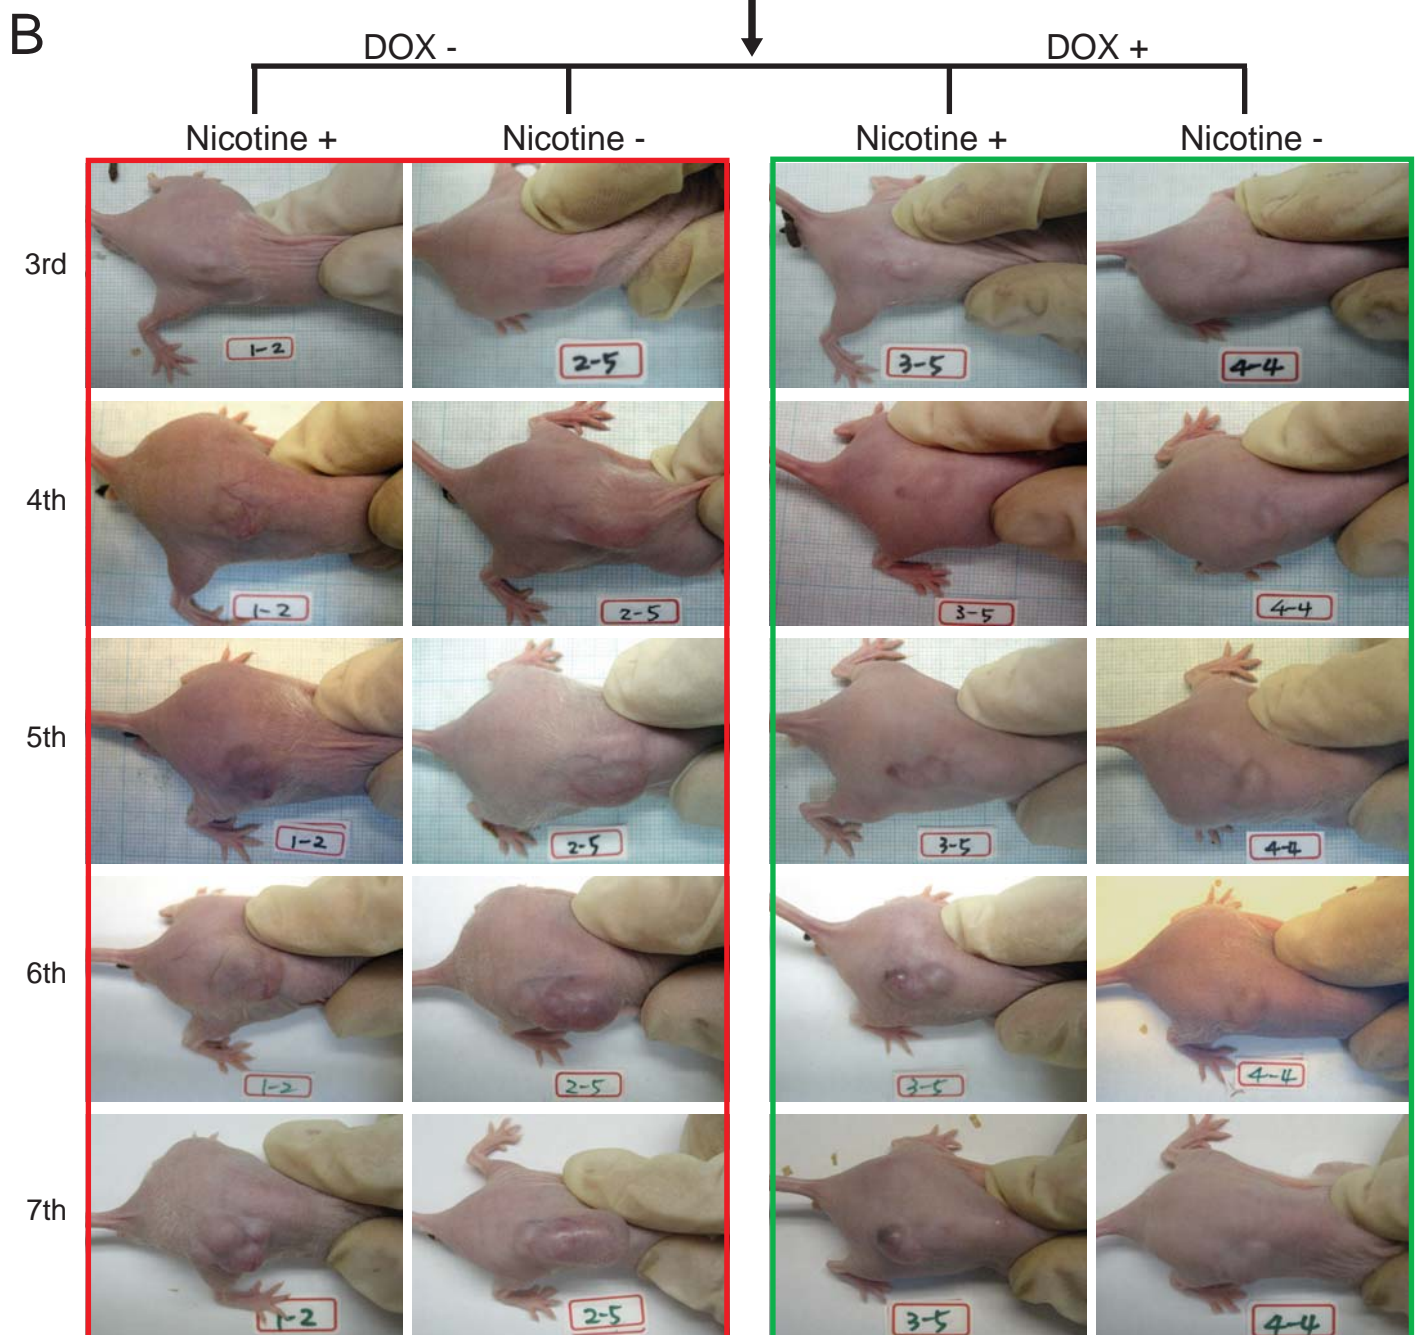

**Figure S5.** In vivo treatment of mice bearing nicotine-transformed MCF-10A cell xenografts and overexpression of the  $\alpha 9$ -nicotinic acetylcholine receptor ( $\alpha 9$ -nAChR) in response to doxycycline (DOX) removal. In the present study, the MCF-10A-Nic (DOX) transformed cell line was generated from soft agar colonies treated long-term with nicotine. The  $\alpha 9$ -nAChR gene expression was induced by removal of DOX (DOX-) (Figure 4, B, bars 5 and 6, and Supplementary Figure S4, available online). **A)** Four representative female BALB/c-nu/nu mice (green square frame) from each group were injected subcutaneously with MCF-10A-Nic (DOX) ( $5 \times 10^6$ ) cells. Adenovirus vector-transfected MCF-10A (neo) cells were also injected into mice as a negative control (data not shown). Mice with established tumors were treated with DOX (0.5 mg/mL) in the presence or absence of nicotine (10 mg/mL) in their drinking water until the tumors reached a mean size of 200 mm<sup>3</sup>. **B)** The mice described above were subdivided into two groups, designated DOX- and DOX+ (represented by the red and green square frames, respectively) according to the regulation of  $\alpha 9$ -nAChR mRNA expression. The mice were consecutively treated with or without nicotine in their drinking water (nicotine+, 10 mg/mL, vs nicotine-) for an additional 5 weeks.
