# Supplementary material
Source: PubMed Central journal article supplement (PMC2935477)
Supplement: djq301_6.pdf [file djq301_6.pdf]

**Supplementary Table 3**

Demographic evaluation of tobacco smoking history, clinical staging criteria, and  $\alpha 9$ -nAChR mRNA expression fold ratios of tumor vs normal paired samples.

| <b>Patient Characteristic</b>                                                                                  | <b>Current Smokers<br/>(n= 18)</b> | <b>Passive Smokers<br/>(n=52)</b> | <b>Nonsmokers<br/>(n=104)</b> |
|----------------------------------------------------------------------------------------------------------------|------------------------------------|-----------------------------------|-------------------------------|
| Clinical Breast Cancer Stage, No. (%)                                                                          |                                    |                                   |                               |
| 0                                                                                                              | ND*                                | 3 (5.8)                           | 6 (5.8)                       |
| 1                                                                                                              | 3 (16.7)                           | 16 (30.8)                         | 34 (32.7)                     |
| 2                                                                                                              | 8 (44.4)                           | 26 (50)                           | 44 (42.3)                     |
| 3                                                                                                              | 6 (33.3)                           | 6 (11.5)                          | 20 (19.2)                     |
| 4                                                                                                              | 1 (5.6)                            | 1 (1.9)                           | ND                            |
| Relative $\alpha 9$ -nAChR mRNA expression<br>in tumor vs normal tissue,<br>No. (mean fold-difference, 95% CI) |                                    |                                   |                               |
| <1 fold difference<br>(Normal > Tumor )                                                                        | 4 (0.83, 0.42 to 1.24) †           | 11 (0.37, 0.17 to 0.57)           | 43 (0.3, 0.01 to 0.6)         |
| 1–5 fold difference<br>(Tumor > Normal)                                                                        | 8 (2.87, 1.33 to 4.42)             | 31 (2.59, 1.93 to 3.25 )          | 61(2.37, 1.19 to 3.54)        |

|                        |                           |                         |                         |
|------------------------|---------------------------|-------------------------|-------------------------|
| >5 fold difference     | 6 (15.5, 8.95 to 22.05)   | 10 (6.22, 3.62 to 2.6)  | ND                      |
| Total (Mean per group) | 18 (6.62, 3.66 to 9.58) ‡ | 52 (2.81, 1.87 to 3.75) | 104(1.51, 0.69 to 2.33) |

\* ND = not determined.

†  $P = .008$  for current vs nonsmokers in comparisons using two-sided nonparametric Kruskal-Wallis and Mann-Whitney tests.

‡  $P = .003$ . for current vs nonsmokers in comparisons using two-sided nonparametric Kruskal-Wallis and Mann-Whitney tests. A  $P$ -value  $\leq .05$  was considered to be statistically significant.
