# Supplementary material
Source: PubMed Central journal article supplement (PMC2935477)
Supplement: djq301_7.pdf [file djq301_7.pdf]

**Supplementary Table 1.**

Demographic evaluation of clinical criteria, and  $\alpha 9$ -nAChR mRNA expression fold ratios of tumor vs normal paired samples.

| Characteristic | Total No. of Patients | $\alpha 9$ -nAChR (N>T) |                    |          | $\alpha 9$ -nAChR (T>N) |                     |          |
|----------------|-----------------------|-------------------------|--------------------|----------|-------------------------|---------------------|----------|
|                |                       | No.                     | mean fold & 95% CI | <i>P</i> | No.                     | mean fold & 95% CI  | <i>P</i> |
| Age            |                       |                         |                    | .42      |                         |                     | .36      |
| < 50 y         | 18                    | 6                       | 3.4 (-1.6 to 8.3)  |          | 12                      | 9.5 (4.7 to 14.3)   |          |
| ≥ 50 y         | 32                    | 11                      | 5.9 (1.0 to 10.7)  |          | 21                      | 9.4 (3.8 to 15)     |          |
| Size of tumor  |                       |                         |                    | .22      |                         |                     | .07      |
| T1             | 9                     | 1                       | 3.7                |          | 8                       | 5.9 (1.1 to 10.7)   |          |
| T2             | 25                    | 10                      | 5.4 (2.9 to 7.9)   |          | 15                      | 9.3 (2.7 to 15.9)   |          |
| T3             | 15                    | 6                       | 4.6 (2.1 to 9.1)   |          | 9                       | 12.4 (-3.4 to 28.2) |          |
| T4             | 1                     | 0                       | ND                 |          | 1                       | 13.5,               |          |
| Nodal status   |                       |                         |                    | .51      |                         |                     | .24      |
| N0             | 30                    | 10                      | 5 (-1 to 11)       |          | 20                      | 8.9 (3 to 14.8)     |          |
| N1             | 11                    | 6                       | 5.3 (0.6 to 10)    |          | 5                       | 8.6 (1.7 to 15.5)   |          |
| N2             | 4                     | 1                       | 3.1                |          | 3                       | 11.9 (-1.9 to 25.6) |          |
| N3             | 5                     | 0                       |                    |          | 5                       | 11.2 (1.4 to 21)    |          |
| Stage          |                       |                         |                    | .63      |                         |                     | .04*     |
| I              | 15                    | 6                       | 6.5 (2 to 8.5)     |          | 9                       | 1.2 (0.3 to 2)      |          |
| II             | 19                    | 6                       | 3.3 (-0.6-7.2)     |          | 13                      | 8.7 (1.4 to 16)     |          |
| III            | 15                    | 5                       | 5.3 (-1.2 to 11.8) |          | 10                      | 17.4(2.2 to 32.6)   |          |
| IV             | 1                     | 0                       |                    |          | 1                       | 13.5                |          |
| ER status      |                       |                         |                    | .21      |                         |                     | .05*     |
| Negative       | 17                    | 5                       | 4.5 (1.6 to 7.4)   |          | 12                      | 7.2 (1.1 to 13.3)   |          |
| Positive       | 33                    | 12                      | 5.4 (2.8 to 7.8)   |          | 21                      | 10.2(3.1 to 17.3)   |          |
| PR status      |                       |                         |                    | .87      |                         |                     | .83      |
| Negative       | 26                    | 6                       | 4.5(0.2 to 8.8)    |          | 20                      | 9.4 (0.5 to 18.3)   |          |
| Positive       | 24                    | 11                      | 5.3 (2.8 to 7.8)   |          | 13                      | 9.5 (1.8 to 17.2)   |          |
| Her-2 status   |                       |                         |                    | .22      |                         |                     | .06      |
| Negative       | 31                    | 14                      | 5.1 (1.1 to 9.1)   |          | 17                      | 6.7(1.4 to 12)      |          |
| Positive       | 19                    | 3                       | 4.3(2.6 to 6.7)    |          | 16                      | 13.7(1.9 to 25.5)   |          |

|                 |    |    |                   |     |    |                    |      |
|-----------------|----|----|-------------------|-----|----|--------------------|------|
| 5-year survival |    |    |                   | .13 |    |                    | .04* |
| Alive           | 46 | 16 | 5.3 (1.9 to 8.7)  |     | 30 | 8.8(-1.4 to 19)    |      |
| Dead            | 4  | 1  | 1.2               |     | 3  | 15.7 (9.5 to 22)   |      |
| Chemotherapy    |    |    |                   | .31 |    |                    | .44  |
| No              | 15 | 10 | 5.5(1.7 to 9.3)   |     | 5  | 9.6 (0.8 to 18.4)  |      |
| Yes             | 35 | 7  | 4.3 (-0.3 to 8.9) |     | 28 | 9.4 (2.1 to 16.7)  |      |
| Radiotherapy    |    |    |                   | .27 |    |                    | .31  |
| No              | 34 | 12 | 5.1(-0.3 to 10.5) |     | 22 | 9.7 (-1.5 to 20.9) |      |
| Yes             | 16 | 5  | 4.8 (1.1 to 8.5)  |     | 11 | 8.9 (-1.4 to 19.2) |      |
| Tamoxifen       |    |    |                   | .21 |    |                    | .05* |
| No              | 20 | 5  | 4.5 (1.6 to 7.4)  |     | 15 | 7.2 (1.1 to 13.3)  |      |
| Yes             | 30 | 12 | 5.4 (2.8 to 7.8)  |     | 18 | 10.2(3.1 to 17.3)  |      |
| Herceptin       |    |    |                   | .11 |    |                    | .29  |
| No              | 42 | 16 | 5 (0.9 to 9.1)    |     | 26 | 9.4 (-1.4 to 20.2) |      |
| Yes             | 8  | 1  | 4.9               |     | 7  | 8.2 (1.6 to 14.8)  |      |

\* Fold ratios of  $\alpha 9$ -nAChR mRNA expression were determined in normal/tumor or tumor/normal paired samples. Data were analyzed using univariate analyses. A  $P$ -value  $< 0.05$  was considered as statistically significant. All  $P$ -values are two-sided.

§ Mean: average fold ratio of  $\alpha 9$ -nAChR mRNA expression in each group.
