# Supplementary material
Source: PubMed Central journal article supplement (PMC2935477)
Supplement: djq301_8.pdf [file djq301_8.pdf]

**Supplementary Table 2.** List of siRNAs and primers used and their sequences.

| #  | Primer name*        | Application | Sequence                             |
|----|---------------------|-------------|--------------------------------------|
| 1  | nAChR $\alpha$ 1-F  | RT-PCR      | 5'-CGTCTGGTGGCAAAGCT-3'              |
| 2  | nAChR $\alpha$ 1-R  | RT-PCR      | 5'-CCGCTCTCCATGAAGTT-3'              |
| 3  | nAChR $\alpha$ 2-F  | RT-PCR      | 5'-CCGGTGGCTTCTGATGA-3'              |
| 4  | nAChR $\alpha$ 2-R  | RT-PCR      | 5'-CAGATCATTCCAGCTAGG-3'             |
| 5  | nAChR $\alpha$ 3-F  | RT-PCR      | 5'-CCATGTCTCAGCTGGTG-3'              |
| 6  | nAChR $\alpha$ 3-R  | RT-PCR      | 5'-GTCCTGAGGTTTCATGGA-3'             |
| 7  | nAChR $\alpha$ 4-F  | RT-PCR      | 5'-GAATGTCACCTCCATCCGCATC-3'         |
| 8  | nAChR $\alpha$ 4-R  | RT-PCR      | 5'-CCGGCAATTGTCCTTGACCAC-3'          |
| 9  | nAChR $\alpha$ 5-F  | RT-PCR      | 5'-TCATGTAGACAGGACTTC-3'             |
| 10 | nAChR $\alpha$ 5-R  | RT-PCR      | 5'-ATTGCCCATTATAAATAA-3'             |
| 11 | nAChR $\alpha$ 6-F  | RT-PCR      | 5'-GGCCTCTGGACAAGACAA-3'             |
| 12 | nAChR $\alpha$ 6-R  | RT-PCR      | 5'-AAGATTTTCCTGTGTCCC-3'             |
| 13 | nAChR $\alpha$ 7-F  | RT-PCR      | 5'-CACAGTGGCCCTGCAGACCGATGGTACGGA-3' |
| 14 | nAChR $\alpha$ 7-R  | RT-PCR      | 5'-CTCAGTGGCCCTGCTGACCGATGGTACGGA-3' |
| 15 | nAChR $\alpha$ 9-F  | RT-PCR      | 5'-GTCCAGGGTCTTGTGTTGT-3'            |
| 16 | nAChR $\alpha$ 9-R  | RT-PCR      | 5'-ATCCGCTCTTGCTATGAT-3'             |
| 17 | nAChR $\alpha$ 10-F | RT-PCR      | 5'-CTGTTCCGTGACCTCTTT-3'             |

|           |                              |        |                                                                              |
|-----------|------------------------------|--------|------------------------------------------------------------------------------|
| <b>18</b> | nAChR $\alpha$ 10-R          | RT-PCR | 5'- <i>GGAAGGCTGCTACATCCA</i> -3'                                            |
| <b>19</b> | nAChR $\beta$ 2-F            | RT-PCR | 5'- <i>CGGCTCCCTTCCAAACACA</i> -3'                                           |
| <b>20</b> | nAChR $\beta$ 2-R            | RT-PCR | 5'- <i>GCAATGATGGCGTGGCTGCTGCA</i> -3'                                       |
| <b>21</b> | nAChR $\beta$ 3-F            | RT-PCR | 5'- <i>AGAGGCTCTTCTGCAGA</i> -3'                                             |
| <b>22</b> | nAChR $\beta$ 3-R            | RT-PCR | 5'- <i>GCCACATCTTCAAAGCAG</i> -3'                                            |
| <b>23</b> | nAChR $\beta$ 4-F            | RT-PCR | 5'- <i>CTGAAACAGGAATGGACT</i> -3'                                            |
| <b>24</b> | nAChR $\beta$ 4-R            | RT-PCR | 5'- <i>CCATGTCTATCTCCGTGT</i> -3'                                            |
| <b>25</b> | nAChR $\alpha$ 9 siRNA1-F    | shRNA  | 5'- <i>GATCCCCTGTGATCTCCTATGGCTGCTTCAAGAGAGCAGCCATAGGAGATCACATTTTAA</i> -3'  |
| <b>26</b> | nAChR $\alpha$ 9 siRNA1-R    | shRNA  | 5'- <i>AGCTTAAAAATGTGATCTCCTATGGCTGCTCTCTTGAAGCAGCCATAGGAGATCACAGGG</i> -3'  |
| <b>27</b> | nAChR $\alpha$ 9 siRNA2-F    | shRNA  | 5'- <i>GATCCCCAAAGCAGCCAGGAACAAAGTTCAAGAGACTTTGTTCTGGCTGCTTTTTTTAA</i> -3'   |
| <b>28</b> | nAChR $\alpha$ 9 siRNA2-R    | shRNA  | 5'- <i>AGCTTAAAAAAAAGCAGCCAGGAACAAAGTCTCTTGAAGTTGTTCTGGCTGCTTTGGG</i> -3'    |
| <b>29</b> | nAChR $\alpha$ 5 siRNA1-F    | shRNA  | 5'- <i>GATCCCCCTGTATTGGGCTCTCATTTTCAAGAGAAATGAGAGCCCAATACAGGTTTTTA</i> -3'   |
| <b>30</b> | nAChR $\alpha$ 5 siRNA1-R    | shRNA  | 5'- <i>AGCTTAAAAACCTGTATTGGGCTCTCATTTCTCTTGAAATGAGAGCCCAATACAGGGGG</i> -3'   |
| <b>31</b> | nAChR $\alpha$ 5 siRNA2-F    | shRNA  | 5'- <i>GATCCCCCGTCTTCGCTATCAACATTTCAAGAGAATGTTGATAGCGAAGACGGTTTTTA</i> -3'   |
| <b>32</b> | nAChR $\alpha$ 5 siRNA2-R    | shRNA  | 5'- <i>AGCTTAAAAACCGTCTTCGCTATCAACATTTCTCTTGAAATGTTGATAGCGAAGACGGGGG</i> -3' |
| <b>33</b> | nAChR $\alpha$ 9SC siRNA1-F  | shRNA  | 5'- <i>GATCCCCGAGACGTGTTTCGCTTCTCTTCAAGAGAGAGAAAGCGAACACGTCTCTTTTAA</i> -3'  |
| <b>34</b> | nAChR $\alpha$ 9 SC siRNA1-R | shRNA  | 5'- <i>AGCTTAAAAAGAGACGTGTTTCGCTTCTCTCTCTTGAAGAGAAAGCGAACACGTCTCGGG</i> -3'  |
| <b>35</b> | nAChR $\alpha$ 9 SC siRNA2-F | shRNA  | 5'- <i>GATCCCCGGAACAAACAAGCACGAATTCAGAGATTCGTGCTGTTTGTCCCTTTTAA</i> -3'      |

|           |                              |               |                                                                    |
|-----------|------------------------------|---------------|--------------------------------------------------------------------|
| <b>36</b> | nAChR $\alpha$ 9 SC siRNA2-R | shRNA         | 5'-AGCTTAAAAAGGGAACAAACAAGCACGAATCTCTTGAATTCTGTGCTTGTGTTGCCGGG-3'  |
| <b>27</b> | nAChR $\alpha$ 5 SC siRNA1-F | shRNA         | 5'-GATCCCCTAGACGCGTTTTCTCTCGTTTCAAGAGAACGAGAGAAAACGCGTCTATTTTAA-3' |
| <b>38</b> | nAChR $\alpha$ 5 SC siRNA1-R | shRNA         | 5'-AGCTTAAAAATAGACGCGTTTTCTCTCGTTCTCTTGAACGAGAGAAAACGCGTCTAGGG-3'  |
| <b>39</b> | nAChR $\alpha$ 5 SC siRNA2-F | shRNA         | 5'-GATCCCCTATACAGTATGCCTCCTTCTTCAAGAGAGAAGGAGGCATACGTGTATTTTAA-3'  |
| <b>40</b> | nAChR $\alpha$ 5 SC siRNA2-R | shRNA         | 5'-AGCTTAAAAATACAGTATGCCTCCTTCTCTTGAAGAAGGAGGCATACGTGTATGGG-3'     |
| <b>41</b> | Human nAChR $\alpha$ 9-F     | Real-time PCR | 5'-TACATCGCCAAGTGCTC-3'                                            |
| <b>42</b> | Human nAChR $\alpha$ 9-R     | Real-time PCR | 5'-TGTGACTAATCCGCTCTTGC-3'                                         |
| <b>43</b> | Human GUS-F                  | Real-time PCR | 5'-AGTGTCCCTGCTAGAATAGATG-3'                                       |
| <b>44</b> | Human GUS-R                  | Real-time PCR | 5'-AACAGCCCCTTACTTGAG-3'                                           |
| <b>45</b> | nAChR $\alpha$ 9 Tet-off-F   | Cloning       | 5'-GTTGAATTCTATGAACTGGTCCCATTCTGC-3'                               |
| <b>46</b> | nAChR $\alpha$ 9 Tet-off-R   | Cloning       | 5'-GCGTCTAGACTAATCCGCTCTTGCTATGAT-3'                               |

\* F = Forward, R= reverse, RT-PCR = reverse transcription-polymerase chain reaction, shRNA = short hairpin RNA, siRNA = short interfering RNA, nAChR= nicotinic acetylcholine receptor, GUS =  $\beta$ -glucuronidase, SC = scrambled.
